# Supplementary material for: Erythrocyte membrane fatty acid composition is related to overloaded plasma ferritin in Chinese males with angiographic coronary artery disease
Source: Royal Society of Chemistry journal article supplement (doi:10.1039/c3fo30363b), 2013-01-01
Supplement: c3fo30363b.pdf [file c3fo30363b.pdf]

1 **Supplementary materials**

2 **Supplementary file 1**

3 **Table S1**

4 Characteristics of the age-and-sex-matched healthy control subjects

| Characteristic                       | Controls (n = 23) |
|--------------------------------------|-------------------|
| General characteristics              |                   |
| Age (y)                              | 62.3 ± 4.2        |
| Male (%)                             | 69.6              |
| Body mass index (kg/m <sup>2</sup> ) | 21.1 ± 1.6        |
| Smoking (%)                          | 17.4              |
| Family history (%)                   | —                 |
| Lipid (mmol/L)                       |                   |
| Total cholesterol                    | 4.5 ± 0.4         |
| Triglyceride                         | 0.9 ± 0.3         |
| HDL-C                                | 1.4 ± 0.3         |
| LDL-C                                | 2.9 ± 0.5         |
| Blood pressure (mmHg)                |                   |
| Systolic blood pressure              | 115.0 ± 13.5      |
| Diastolic blood pressure             | 76.5 ± 7.8        |
| Disease (%)                          |                   |
| Hypertension                         | 0.0               |
| Hyperlipidemia                       | 0.0               |
| Acute coronary syndrome              | 0.0               |

|                  |                     |
|------------------|---------------------|
| Medicine (%)     |                     |
| Aspirin          | 0.0                 |
| Statins          | 0.0                 |
| Iron status      |                     |
| Ferritin (ng/mL) | 124.0 (93.3, 161.3) |
| Overloaded (%)   | 8.7                 |
| CRP (mg/L)       | 0.7 (0.4, 1.8)      |

---

5 HDL-C: high-density lipoprotein cholesterol; LDL-C: low-density lipoprotein cholesterol; CRP: C-reactive protein; —: no data.

6

7 **Supplementary file 2**

8 **Table S2**

9 Correlations of Ery-FAs and FA desaturase activities with plasma ferritin levels of different sex

| FAs                             | Males (n = 343) |                | Females (n = 103) |                |
|---------------------------------|-----------------|----------------|-------------------|----------------|
|                                 | <i>r</i>        | <i>p</i> Value | <i>r</i>          | <i>p</i> Value |
| SFAs                            | 0.083           | 0.128          | 0.170             | 0.108          |
| Palmitic acid (16:0)            | -0.095          | 0.080          | 0.063             | 0.555          |
| Stearic acid (18:0)             | 0.059           | 0.281          | -0.012            | 0.909          |
| Arachidic acid (20:0)           | -0.026          | 0.631          | -0.077            | 0.470          |
| Docosanoic acid (22:0)          | 0.182           | 0.001          | 0.023             | 0.830          |
| Tetracosanoic acid (24:0)       | 0.214           | <0.001         | 0.151             | 0.151          |
| MUFAs                           | -0.058          | 0.293          | -0.016            | 0.879          |
| Palmitoleic acid (16:1n-7)      | 0.047           | 0.386          | 0.061             | 0.565          |
| n-9                             | -0.064          | 0.240          | -0.016            | 0.878          |
| Oleic acid (18:1n-9)            | -0.120          | 0.028          | -0.068            | 0.517          |
| Eicosenoic acid (20:1n-9)       | -0.032          | 0.564          | -0.017            | 0.869          |
| Docosenoic acid (22:1n-9)       | -0.056          | 0.302          | -0.169            | 0.105          |
| Nervonic acid (24:1n-9)         | 0.106           | 0.053          | 0.131             | 0.211          |
| PUFAs                           | -0.048          | 0.379          | -0.074            | 0.489          |
| n-3 PUFAs                       | 0.073           | 0.181          | 0.064             | 0.542          |
| Alpha-linolenic acid (18:3n-3)  | -0.041          | 0.453          | 0.056             | 0.598          |
| Eicosatrienoic acid (20:3n-3)   | -0.055          | 0.311          | 0.011             | 0.919          |
| Eicosapentaenoic acid (20:5n-3) | -0.023          | 0.679          | 0.070             | 0.504          |
| Docosapentaenoic acid (22:5n-3) | 0.071           | 0.192          | 0.124             | 0.240          |
| Docosahexaenoic acid (22:6n-3)  | 0.055           | 0.313          | 0.082             | 0.437          |
| n-6 PUFAs                       | -0.102          | 0.063          | -0.140            | 0.185          |
| Linoleic acid (18:2n-6)         | -0.216          | <0.001         | 0.008             | 0.942          |

|                                       |        |        |        |       |
|---------------------------------------|--------|--------|--------|-------|
| Gamma-linolenic acid (18:3n-6)        | 0.040  | 0.467  | 0.011  | 0.920 |
| Eicosadienoic acid (20:2n-6)          | -0.032 | 0.552  | 0.072  | 0.494 |
| Arachidonic acid (20:4n-6)            | 0.061  | 0.269  | -0.113 | 0.290 |
| Adrenic acid (22:4n-6)                | 0.042  | 0.441  | -0.008 | 0.941 |
| FA ratios                             |        |        |        |       |
| 16:1n-7/16:0 (estimated SCD activity) | 0.077  | 0.157  | 0.047  | 0.657 |
| 18:1n-9/18:0 (estimated SCD activity) | -0.132 | 0.015  | -0.013 | 0.901 |
| 24:1n-9/24:0 (estimated SCD activity) | -0.202 | <0.001 | -0.015 | 0.886 |

---

10

11 Abbreviations: CAD: coronary artery disease; Ery-FAs: erythrocyte membrane fatty acids; MUFAs: monounsaturated fatty acids; PUFAs:

12 polyunsaturated fatty acids; SCD: stearyl-CoA desaturase; SFAs: saturated fatty acids.

13
